# Supplementary material for: Economic Cost and Burden of Dengue in the Philippines
Source: PubMed Central journal article supplement (PMC4347342; doi:10.4269/ajtmh.14-0139), 2015-02-04
Supplement: SD5.pdf [file SD5.pdf]

Republic of the Philippines  
CITY HEALTH DEPARTMENT  
City of Cebu

**EPIDEMIOLOGICAL CASE INVESTIGATION**

Date of Investigation \_\_\_\_\_

Investigator (Name / Position) \_\_\_\_\_

Informant / Relation \_\_\_\_\_

**I. PERSONAL DATA:**

Name \_\_\_\_\_ Age \_\_\_\_\_ Sex \_\_\_\_\_ C.S. \_\_\_\_\_

Complete Address \_\_\_\_\_

Length of Stay in above Address \_\_\_\_\_

Provincial / Previous Address \_\_\_\_\_

Occupation \_\_\_\_\_

School / Office Address \_\_\_\_\_

Father's Name \_\_\_\_\_ Mother's Name \_\_\_\_\_

**II. CLINICAL DATA:**

Date of Onset \_\_\_\_\_ Duration (days) \_\_\_\_\_

Outcome : ( ) Still Sick ( ) Recovered ( ) Died

Consulted : ( Y ) ( N ) If yes, when \_\_\_\_\_ where \_\_\_\_\_

Admitted : ( Y ) ( N ) If yes, when \_\_\_\_\_ where \_\_\_\_\_

Treatment: ( ) Antipyretics ( ) IV Fluids ( ) Blood Transfusion

Others \_\_\_\_\_

Signs & Symptoms: ( ) Fever ( ) Chills ( ) Headache ( ) Abdo. Pain

( ) Epistaxis ( ) Cough Others \_\_\_\_\_

Complication (s): ( Y ) ( N ) What \_\_\_\_\_

Laboratory Exams: **When** **Where** **Result**

CBC \_\_\_\_\_

Platelet Det. \_\_\_\_\_

Others \_\_\_\_\_

Diagnosis: Tentative \_\_\_\_\_ Final \_\_\_\_\_

**III. EPIDEMIOLOGICAL NOTES:**

Do you use protection against mosquitoes ( Y ) ( N )

If yes, what \_\_\_\_\_

Presence of mosquito breeding places:

Stagnant water: ( ) Drainage canals ( ) Excavation ( ) Old tires  
( ) Empty containers ( ) Others \_\_\_\_\_

Shaded areas under trees

Knowledge of other Dengue cases in the area:  
\_\_\_\_\_  
\_\_\_\_\_

**IV. OTHER PERTINENT DATA:**

\_\_\_\_\_  
\_\_\_\_\_  
\_\_\_\_\_

**V. INTERVENTIONS DONE:**

\_\_\_\_\_  
\_\_\_\_\_  
\_\_\_\_\_

**SUBMITTED BY:**

\_\_\_\_\_  
(Printed name, Position & Signature) Medical Officer

Date submitted: \_\_\_\_\_

Received by: \_\_\_\_\_

Date Received \_\_\_\_\_

SUPPLEMENTAL FIGURE 1. Epidemiological case investigation.

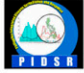

Philippine Integrated Disease Surveillance and Response

Case Report Form  
**Dengue** (ICD 10 Code: A90-A91)

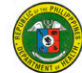

Region: \_\_\_\_\_ Province: \_\_\_\_\_ Municipality/City: \_\_\_\_\_  
 Name of DRU: \_\_\_\_\_ Type: RHU CHO Gov't Hospital Private Hospital Clinic  
 Address: \_\_\_\_\_ Private Laboratory Public Laboratory Seaport/Airport

| Patient No.                          | Patient's Full Name                         | Age                                                                                   | Sex (F/M) | Date of Birth | Complete Address                                                                 | Admitted?         | Date admitted/seen/consulted | Date onset of illness | Type                                                                | Case classification                          | Outcome                                             |
|--------------------------------------|---------------------------------------------|---------------------------------------------------------------------------------------|-----------|---------------|----------------------------------------------------------------------------------|-------------------|------------------------------|-----------------------|---------------------------------------------------------------------|----------------------------------------------|-----------------------------------------------------|
|                                      |                                             |                                                                                       |           | ___/___/___   |                                                                                  |                   | ___/___/___                  | ___/___/___           |                                                                     |                                              |                                                     |
|                                      |                                             |                                                                                       |           | ___/___/___   |                                                                                  |                   | ___/___/___                  | ___/___/___           |                                                                     |                                              |                                                     |
|                                      |                                             |                                                                                       |           | ___/___/___   |                                                                                  |                   | ___/___/___                  | ___/___/___           |                                                                     |                                              |                                                     |
|                                      |                                             |                                                                                       |           | ___/___/___   |                                                                                  |                   | ___/___/___                  | ___/___/___           |                                                                     |                                              |                                                     |
|                                      |                                             |                                                                                       |           | ___/___/___   |                                                                                  |                   | ___/___/___                  | ___/___/___           |                                                                     |                                              |                                                     |
| <b>Response Codes / Instructions</b> | Indicate First name, Middle name, Last name | Age: Indicate<br>D - days<br>M - months<br>Yr. - years<br>Sex: F - Female<br>M - Male |           | mm/dd/yy      | Specify Street/Purok/Subdivision, House #, Barangay, Municipality/City, Province | Y - Yes<br>N - No | mm/dd/yy                     | mm/dd/yy              | W - with warning signs<br>N - no warning signs<br>S - Severe Dengue | S - Suspect<br>P - Probable<br>C - Confirmed | A - Alive<br>D - Died (specify date)<br>U - Unknown |

**Clinical Case Definition/Classification:**  
Dengue without Warning signs

- Suspect**  
A previously well person with acute febrile illness of 2-7 days duration plus two of the following:  
Headache, Body malaise, Myalgia, Arthralgia, Retro-orbital pain, Anorexia, Nausea, Vomiting, Diarrhea, Flushed skin, Rash (petechial, Herman's sign)
- Probable**  
A suspect case plus:  
Laboratory test, at least CBC (leucopenia with or without thrombocytopenia) and/or Dengue NS1, antigen test or dengue IgM antibody test (optional)
- Confirmed:**  
- Viral culture isolation,  
- Polymerase Chain Reaction

Dengue with Warning Signs

- A previously well person with acute febrile illness of 2-7 days duration plus any one of the following:  
- Abdominal pain or tenderness  
- Persistent vomiting  
- Clinical signs of fluid accumulation  
- Mucosal bleeding  
- Lethargy, restlessness  
- Liver enlargement  
- Laboratory: increase in Hct and/or decreasing platelet count

Severe Dengue

- A previously well person with acute febrile illness of 2-7 days duration and any of the clinical manifestations for dengue with or without warning signs.  
Plus any of the following:  
Severe plasma leakage leading to  
- Shock  
- Fluid accumulation with respiratory distress  
Severe bleeding  
Severe organ impairment  
- Liver: AST or ALT  $\geq$ 1000  
- CNS: e.g. seizures, impaired consciousness  
- Heart: e.g. myocarditis  
- Kidneys: e.g. renal failure

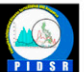

Philippine Integrated Disease Surveillance and Response

Case Report Form  
**Dengue** (ICD 10 Code: A90-A91)

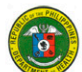

| Patient No.                          | Patient's Full Name                         | Age                                                                                   | Sex (F/M) | Date of Birth | Complete Address                                                                 | Admitted?         | Date admitted/seen/consulted | Date onset of illness | Type                                                                | Case classification                          | Outcome                                             |
|--------------------------------------|---------------------------------------------|---------------------------------------------------------------------------------------|-----------|---------------|----------------------------------------------------------------------------------|-------------------|------------------------------|-----------------------|---------------------------------------------------------------------|----------------------------------------------|-----------------------------------------------------|
|                                      |                                             |                                                                                       |           | ___/___/___   |                                                                                  |                   | ___/___/___                  | ___/___/___           |                                                                     |                                              |                                                     |
|                                      |                                             |                                                                                       |           | ___/___/___   |                                                                                  |                   | ___/___/___                  | ___/___/___           |                                                                     |                                              |                                                     |
|                                      |                                             |                                                                                       |           | ___/___/___   |                                                                                  |                   | ___/___/___                  | ___/___/___           |                                                                     |                                              |                                                     |
|                                      |                                             |                                                                                       |           | ___/___/___   |                                                                                  |                   | ___/___/___                  | ___/___/___           |                                                                     |                                              |                                                     |
|                                      |                                             |                                                                                       |           | ___/___/___   |                                                                                  |                   | ___/___/___                  | ___/___/___           |                                                                     |                                              |                                                     |
|                                      |                                             |                                                                                       |           | ___/___/___   |                                                                                  |                   | ___/___/___                  | ___/___/___           |                                                                     |                                              |                                                     |
|                                      |                                             |                                                                                       |           | ___/___/___   |                                                                                  |                   | ___/___/___                  | ___/___/___           |                                                                     |                                              |                                                     |
|                                      |                                             |                                                                                       |           | ___/___/___   |                                                                                  |                   | ___/___/___                  | ___/___/___           |                                                                     |                                              |                                                     |
|                                      |                                             |                                                                                       |           | ___/___/___   |                                                                                  |                   | ___/___/___                  | ___/___/___           |                                                                     |                                              |                                                     |
|                                      |                                             |                                                                                       |           | ___/___/___   |                                                                                  |                   | ___/___/___                  | ___/___/___           |                                                                     |                                              |                                                     |
|                                      |                                             |                                                                                       |           | ___/___/___   |                                                                                  |                   | ___/___/___                  | ___/___/___           |                                                                     |                                              |                                                     |
|                                      |                                             |                                                                                       |           | ___/___/___   |                                                                                  |                   | ___/___/___                  | ___/___/___           |                                                                     |                                              |                                                     |
|                                      |                                             |                                                                                       |           | ___/___/___   |                                                                                  |                   | ___/___/___                  | ___/___/___           |                                                                     |                                              |                                                     |
|                                      |                                             |                                                                                       |           | ___/___/___   |                                                                                  |                   | ___/___/___                  | ___/___/___           |                                                                     |                                              |                                                     |
|                                      |                                             |                                                                                       |           | ___/___/___   |                                                                                  |                   | ___/___/___                  | ___/___/___           |                                                                     |                                              |                                                     |
|                                      |                                             |                                                                                       |           | ___/___/___   |                                                                                  |                   | ___/___/___                  | ___/___/___           |                                                                     |                                              |                                                     |
|                                      |                                             |                                                                                       |           | ___/___/___   |                                                                                  |                   | ___/___/___                  | ___/___/___           |                                                                     |                                              |                                                     |
|                                      |                                             |                                                                                       |           | ___/___/___   |                                                                                  |                   | ___/___/___                  | ___/___/___           |                                                                     |                                              |                                                     |
|                                      |                                             |                                                                                       |           | ___/___/___   |                                                                                  |                   | ___/___/___                  | ___/___/___           |                                                                     |                                              |                                                     |
| <b>Response Codes / Instructions</b> | Indicate First name, Middle name, Last name | Age: Indicate<br>D - days<br>M - months<br>Yr. - years<br>Sex: F - Female<br>M - Male |           | mm/dd/yy      | Specify Street/Purok/Subdivision, House #, Barangay, Municipality/City, Province | Y - Yes<br>N - No | mm/dd/yy                     | mm/dd/yy              | W - with Warning signs<br>N - no warning signs<br>S - Severe Dengue | S - Suspect<br>P - Probable<br>C - confirmed | A - Alive<br>D - Died (specify date)<br>U - Unknown |

SUPPLEMENTAL FIGURE 2. Case report form dengue (ICD 10 Code: A90-A91).
